# Supplementary material for: Do Search Engine Helpline Notices Aid in Preventing Suicide? Analysis of Archival Data
Source: PubMed Central journal article supplement (PMC6454333; doi:10.2196/12235), 2019-03-26
Supplement: jmir_v21i3e12235_app1.pdf [file jmir_v21i3e12235_app1.pdf]

**Supplementary Table 1. Background info of the four study regions**

|                                                                                                                                                  | <b>Hong Kong</b>                                                                                    | <b>Taiwan</b>                                                                                        | <b>United States</b>                                                                                  | <b>United Kingdom</b>                                                                                |
|--------------------------------------------------------------------------------------------------------------------------------------------------|-----------------------------------------------------------------------------------------------------|------------------------------------------------------------------------------------------------------|-------------------------------------------------------------------------------------------------------|------------------------------------------------------------------------------------------------------|
| Population (2017) <sup>a</sup>                                                                                                                   | 7,364,883                                                                                           | 23,626,456                                                                                           | 324,459,463                                                                                           | 66,181,585                                                                                           |
| Internet penetration rate (2017) <sup>b</sup>                                                                                                    | 87%                                                                                                 | 87.9%                                                                                                | 87.9%                                                                                                 | 94.8%                                                                                                |
| Age-standardized Suicide rate, per 100,000 people (2012) <sup>c</sup>                                                                            | 8.8                                                                                                 | 13.1                                                                                                 | 12.1                                                                                                  | 6.2                                                                                                  |
| Proportion of different types of suicide information shown in the first-three-page search results by suicide-related search queries <sup>d</sup> | Pro-suicide: 2.8%<br>Anti-suicide: 39.5%<br>Neutral/mixed: 45.2%<br>Irrelevant: 8.4%<br>Error: 4.1% | Pro-suicide: 16.3%<br>Anti-suicide: 41.3%<br>Neutral/mixed: 33.3%<br>Irrelevant: 7.2%<br>Error: 1.9% | Pro-suicide: 11.7%<br>Anti-suicide: 34.9%<br>Neutral/mixed: 29.2%<br>Irrelevant: 16.1%<br>Error: 8.1% | Pro-suicide: 23.1%<br>Anti-suicide: 24.4%<br>Neutral/mixed: 48.6%<br>Irrelevant: 9.4%<br>Error: 0.8% |

**Data Source:**

<sup>a</sup>United Nations (2017). 2017 Revision of World Population Prospects. URL: <https://esa.un.org/unpd/wpp/>

<sup>b</sup>Internet World Stats. Internet Users in the World – December 31, 2017.

<https://www.internetworldstats.com/stats.htm>

<sup>c</sup>World Health Organization (2014). Preventing Suicide: A World Imperative. Full report can be downloaded from:

[http://www.who.int/mental\\_health/suicide-prevention/world\\_report\\_2014/en/](http://www.who.int/mental_health/suicide-prevention/world_report_2014/en/)

<sup>d</sup>US data from Recupero et al. (2008); UK data from Biddle et al. (2016); Hong Kong data from Cheng (2012);

Taiwan data from Chen et al. (2017). Because Biddle et al. (2016) used different coding scheme, their results are

recoded by renaming “all dedicated suicide sites” as “pro-suicide,” combining “against suicide sites,” “prevention

*or support sites,” and “academic or policy sites” as “anti-suicide,” combining “all information sites,” “news reports of individual suicides,” “chatrooms/blog sites focused on suicide methods,” “chatrooms/blog sites discussing various general issues relating to suicide,” “miscellaneous sites reporting on topical issues relating to suicide,” and “collections of images” as “neutral/mixed,” combining “hit not relevant to search term” and “completely joking information” as “Irrelevant,” and renaming “page not available” or “error.”*

**Supplementary Table 2. Examples of six types of webpages.**

|                                                                                                                           | <b>Hong Kong</b>                                                                                                                                                                                              | <b>Taiwan</b>                                                                                                                                                                                                                                                                                                                        | <b>United States</b>                                                                        | <b>United Kingdom</b>                                                                       |
|---------------------------------------------------------------------------------------------------------------------------|---------------------------------------------------------------------------------------------------------------------------------------------------------------------------------------------------------------|--------------------------------------------------------------------------------------------------------------------------------------------------------------------------------------------------------------------------------------------------------------------------------------------------------------------------------------|---------------------------------------------------------------------------------------------|---------------------------------------------------------------------------------------------|
| Pro-suicide (i.e. the main content is encouraging suicide, romanticizing suicide, or introducing detailed suicide method) | <a href="http://www.ed2000.com/ShowFile.asp?FileID=173382">http://www.ed2000.com/ShowFile.asp?FileID=173382</a><br>(promoting a book describing suicide methods in details- “The Complete Manual of Suicide”) | <a href="https://sites.google.com/site/moonofmagic/k2/%E4%B8%8A%E5%90%8A%E5%8E%9F%E7%90%86%E5%8F%E4%BD%8D%E7%BD%AE%E5%8F%83%E8%80%83">https://sites.google.com/site/moonofmagic/k2/%E4%B8%8A%E5%90%8A%E5%8E%9F%E7%90%86%E5%8F%E4%BD%8D%E7%BD%AE%E5%8F%83%E8%80%83</a><br>(detailed information about how to kill oneself by hanging) | <a href="http://lostallhope.com/suicide-methods">http://lostallhope.com/suicide-methods</a> | <a href="http://lostallhope.com/suicide-methods">http://lostallhope.com/suicide-methods</a> |
| Anti-suicide (i.e. about suicide prevention or discouraging suicide)                                                      | <a href="http://www.sbhk.org.hk/">http://www.sbhk.org.hk/</a><br>(A local NGO for suicide prevention)                                                                                                         | <a href="https://www.jtf.org.tw/suicide_prevention/">https://www.jtf.org.tw/suicide_prevention/</a><br>(A local NGO for suicide prevention)                                                                                                                                                                                          | <a href="https://suicidepreventionlifeline.org/">https://suicidepreventionlifeline.org/</a> | <a href="https://www.nhs.uk/conditions/suicide/">https://www.nhs.uk/conditions/suicide/</a> |

|                                                                                               | Hong Kong                                                                                                                                                                                                                                                             | Taiwan                                                                                                                                                                                        | United States                                                                                                                                                                                                     | United Kingdom                                                                                                                                                                            |
|-----------------------------------------------------------------------------------------------|-----------------------------------------------------------------------------------------------------------------------------------------------------------------------------------------------------------------------------------------------------------------------|-----------------------------------------------------------------------------------------------------------------------------------------------------------------------------------------------|-------------------------------------------------------------------------------------------------------------------------------------------------------------------------------------------------------------------|-------------------------------------------------------------------------------------------------------------------------------------------------------------------------------------------|
| Neutral (i.e. factual information about suicide incidents or statistics without notable bias) | <a href="https://zh.wikipedia.org/zh-hk/%e5%90%84%e5%9b%bd%e8%87%aa%e6%9d%80%e7%8e%87%e5%88%97%e8%a1%a8">https://zh.wikipedia.org/zh-hk/%e5%90%84%e5%9b%bd%e8%87%aa%e6%9d%80%e7%8e%87%e5%88%97%e8%a1%a8</a><br>(wiki page about suicide rates in different countries) | <a href="http://tspc.tw/tspc/portal/ho/wdo/index.jsp?sno=81">http://tspc.tw/tspc/portal/ho/wdo/index.jsp?sno=81</a><br>(wiki page about suicide)                                              | <a href="https://en.wikipedia.org/wiki/suicide">https://en.wikipedia.org/wiki/suicide</a>                                                                                                                         | <a href="https://en.wikipedia.org/wiki/suicide">https://en.wikipedia.org/wiki/suicide</a>                                                                                                 |
| Mixed (i.e. mixed pro-suicide and anti-suicide information in the same webpage)               | <a href="http://www.failforum.net/forum/viewthread.php?tid=37802&amp;extra=page=76&amp;filter=0&amp;orderby=dateline&amp;page=1">http://www.failforum.net/forum/viewthread.php?tid=37802&amp;extra=page=76&amp;filter=0&amp;orderby=dateline&amp;page=1</a>           | <a href="http://wotupset.eu5.org/tsl/1308/1376142994232.htm">http://wotupset.eu5.org/tsl/1308/1376142994232.htm</a><br>(an online forum thread mixed comments supporting and criticizing “The | <a href="https://answers.psychcentral.com/story.php?title=i-want-to-die-what-is-the-easiest-way-to-do-that">https://answers.psychcentral.com/story.php?title=i-want-to-die-what-is-the-easiest-way-to-do-that</a> | <a href="http://www.insidermonkey.com/blog/7-easiest-painless-ways-of-killing-yourself-360388/">http://www.insidermonkey.com/blog/7-easiest-painless-ways-of-killing-yourself-360388/</a> |

|                                                                                                          | <b>Hong Kong</b>                                                                                                                                              | <b>Taiwan</b>                                                                                                                                                             | <b>United States</b>                                                                                                                                | <b>United Kingdom</b>                                                                                                         |
|----------------------------------------------------------------------------------------------------------|---------------------------------------------------------------------------------------------------------------------------------------------------------------|---------------------------------------------------------------------------------------------------------------------------------------------------------------------------|-----------------------------------------------------------------------------------------------------------------------------------------------------|-------------------------------------------------------------------------------------------------------------------------------|
|                                                                                                          | (an online forum thread mixed comments encouraging and discouraging a person's suicidal thoughts)                                                             | Complete Manual of Suicide")                                                                                                                                              |                                                                                                                                                     |                                                                                                                               |
| Not a suicide site (using "suicide" as a metaphor or joke. E.g. animal suicide, political suicide, etc.) | <a href="http://news.4399.com/wdshijie/">http://news.4399.com/wdshijie/</a> (a gaming website)                                                                | <a href="https://www.gq.com.tw/entertainment/movie/content-21717.html">https://www.gq.com.tw/entertainment/movie/content-21717.html</a> (about the movie "Suicide Squad") | <a href="http://deathclock.com">http://deathclock.com</a>                                                                                           | <a href="http://www.cracked.com/humor-history.html">http://www.cracked.com/humor-history.html</a>                             |
| Error (i.e. the webpage or major content of the page cannot be found)                                    | <a href="http://www.miketso.com/unluckyhouse/nt/yuenlong/tins_hui_wai/index.html">http://www.miketso.com/unluckyhouse/nt/yuenlong/tins_hui_wai/index.html</a> | <a href="https://www.niusnews.com/=p2ue6j08">https://www.niusnews.com/=p2ue6j08</a>                                                                                       | <a href="https://answers.yahoo.com/question/index?qid=20080722234105aajvsu3">https://answers.yahoo.com/question/index?qid=20080722234105aajvsu3</a> | <a href="http://uncyclopedia.wikia.com/wiki/howto:commit_suicide">http://uncyclopedia.wikia.com/wiki/howto:commit_suicide</a> |

**Supplementary Table 3: Terms associated with the highest probability of clicking on a specific page type**

| <b>Page type</b> | <b>Terms</b>                                                        |
|------------------|---------------------------------------------------------------------|
| Pro-suicide      | best methods, by pills, common, common method, common suicide       |
| Anti-suicide     | am depressed, and suicidal, anonymous, anonymous suicide, chat line |
| Neutral          | articles, hanging, numbers, org, rates                              |
| Mixed            | 10 ways, com, committing, committing suicide, common suicide        |

**Supplementary Table 4: Screenshots of help notices from Hong Kong and from the US**

|                       |  |
|-----------------------|--|
| <p>HK,<br/>Google</p> |  |
| <p>US,<br/>Google</p> |  |
| <p>US,<br/>Bing</p>   |  |
